# Supplementary material for: Development, characterization and biological studies of Mn-doped ZnO/Ti biomaterials for regenerative medicine
Source: Springer Nature journal article supplement (doi:10.1038/s41598-025-09058-z), 2025-10-15
Supplement: MOESM9 [file 41598_2025_9058_MOESM9_ESM.doc]

**Supplementary Materials**

**Morganti Dario**1,+**, Franco Domenico**1,+**, Rizzo Maria Giovanna**1,+**, De Plano Laura Maria**1**, Iaconis Antonella**1**, Calabrese Giovanna**1**, Nicolò Marco Sebastiano**1**, Giovanna De Luca**1***, Carmelo Corsaro**2**, Fazio Enza**2**, Neri Fortunato**2**, Matteo Giunta**3**, Leonardi Antonio Alessio**4**, Nicotra Giuseppe**5**, Conoci Sabrina**1, 4, 6*

ZnO and Mn-ZnO NPs were synthesized in a few steps according to the scheme shown in Figure S1. As for bare ZnO NPs, Zn(CH3COO)2 is dissolved in DMSO as a precursor of Zn2+ ions (Figure S1a), while Mn-ZnO NPs were obtained by simultaneously dissolving Zn(CH3COO)2 and Mn(CH3COO)2 in DMSO (figure S1b) in order to obtain a homogeneous of Zn+2 and Mn2+ ions mixture in solution. Then, N(CH3)4OH (25% w/w) was rapidly added in solution Nanoparticles are obtained by ions co-precipitation adding in solution. The suspensions are finally centrifuged to obtain pure and homogeneously dispersed nanoparticles in DMSO.


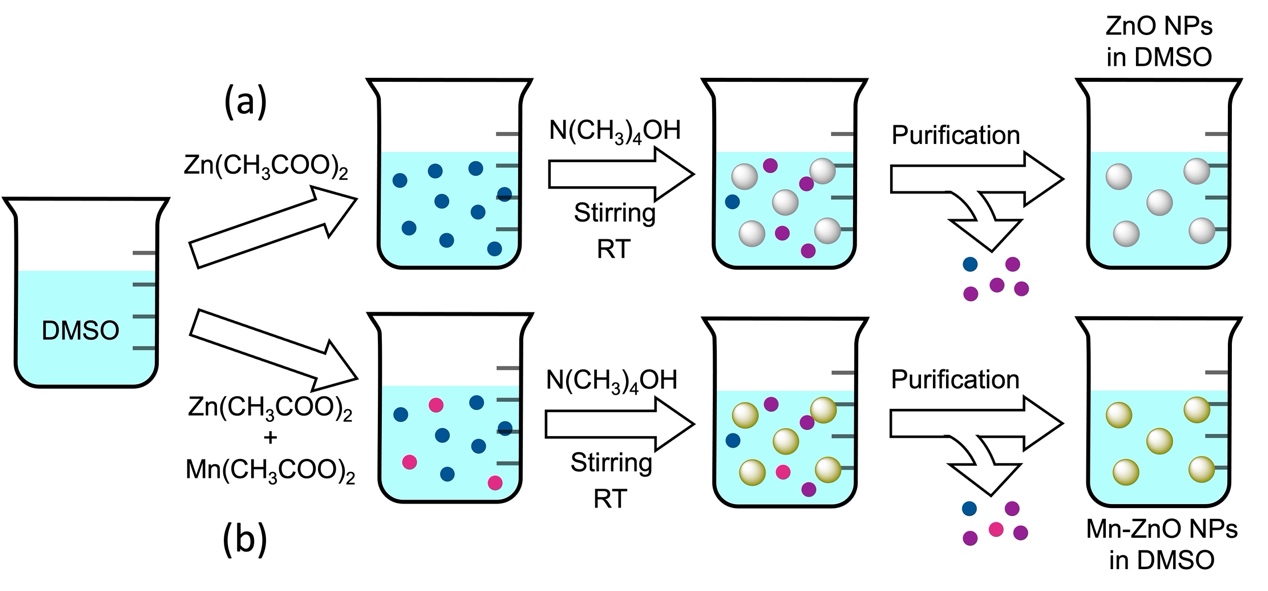


**Figure S1.** *Schematic representation of the ZnO NPs (a) and Mn-ZnO NPs (b) synthesis process.*

This process is very simple, rapid, cheap, and highly reproducible which allows the production of very small semiconductor nanoparticles (below 10 nm) and well stability in solution in a wide range of concentrations. The ease of preparation both in terms of costs and time consuming, combined with the interesting chemical and biological properties make these systems very interesting for industrial and commercial transfer.

The as-synthesized ZnO and Mn-doped ZnO NPs were initially analyzed by a Scanning Electron Microscopy (SEM) in plan-view and the obtained images are visible in Fig. S2 (a) and (b), respectively. In particular, a dispersion of ZnO or Mn-ZnO NPs was dropped on a conductive (resistivity 1-5 Ω*cm) silicon wafer and once dry, analyzed by the SEM. A Zeiss Supra Gemini 25 with a extraction voltage of 10 KV, a working distance of 3 mm, and an InLens detector have been used for these measurements. By the SEM resolution the difference between doped and undoped NPs is negligible. Indeed, the images show NPs with a diameter lower than 10 nm making unreliable a SEM characterization concerning the size distribution as visible by a higher magnification image of the Mn doped ZnO NPs (Fig. S2c). This motivates the High-Resolution Transmission Electron Microscopy (HR-TEM) analysis reported in the main manuscript. The presence of Mn doping in the Mn-doped ZnO NPs was initially investigated by a Rutherford Backscattering Spectrometry (RBS) and the obtained results are visible in Figure S2d.

An ionized He+ beam with an energy of 2 MeV was used to probe the samples in the RBS experiment acquiring the backscattered ion at a backscattering angle of 15° with respect to beam propagation axis. A dispersion of Mn doped ZnO NPs was dropped and let dry on a silicon wafer and the RBS measure was then carried out. RBS is an interesting approach for thin films enabling the stoichiometry analysis (depending on the atomic number, Z) and thickness measurement for film of thickness down to few nanometers. Unfortunately, a quantitative analysis by fitting the RBS curve for discontinuous films (as a distribution of NPs) is extremely complex even taking into account porosity and roughness parameters of the film. Moreover, this is even more difficult considering that the Zn and Mn have very small (the higher Z the more sensitive is RBS) and similar atomic numbers (Zn = 30, Mn = 25). Despite these issues, a qualitative analysis attesting the presence of Mn and Zn was successfully made. The Mn (1.48 MeV) and Zn (1.55 MeV) contributes were fitted (pink curve) and their presence is highlighted by the dashed bar into the graph. The very long tail that is not fitted is due to the discontinuous distribution of NPs with uncovered areas of the substrate. The highest contribute at lower energy (1.1 MeV) is the silicon coming from the substrate. This analysis confirmed the presence of Mn that was further confirmed by Energy Dispersive X-rays (EDX) measurement as reported along the manuscript.


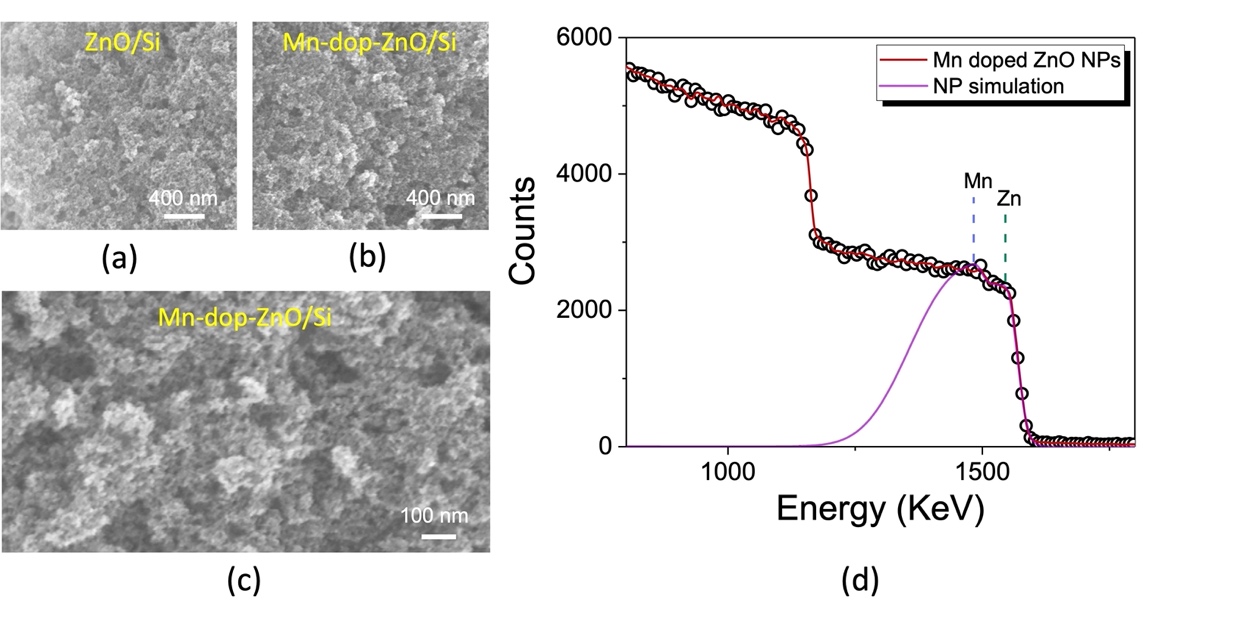


**Figure S2.** *SEM images in plan-view of undoped and Mn-doped ZnO NPs in (a) and (b), respectively. (c) Higher magnification of Mn-doped ZnO NPs distribution. (d) RBS analysis of the Mn doped ZnO NPs*


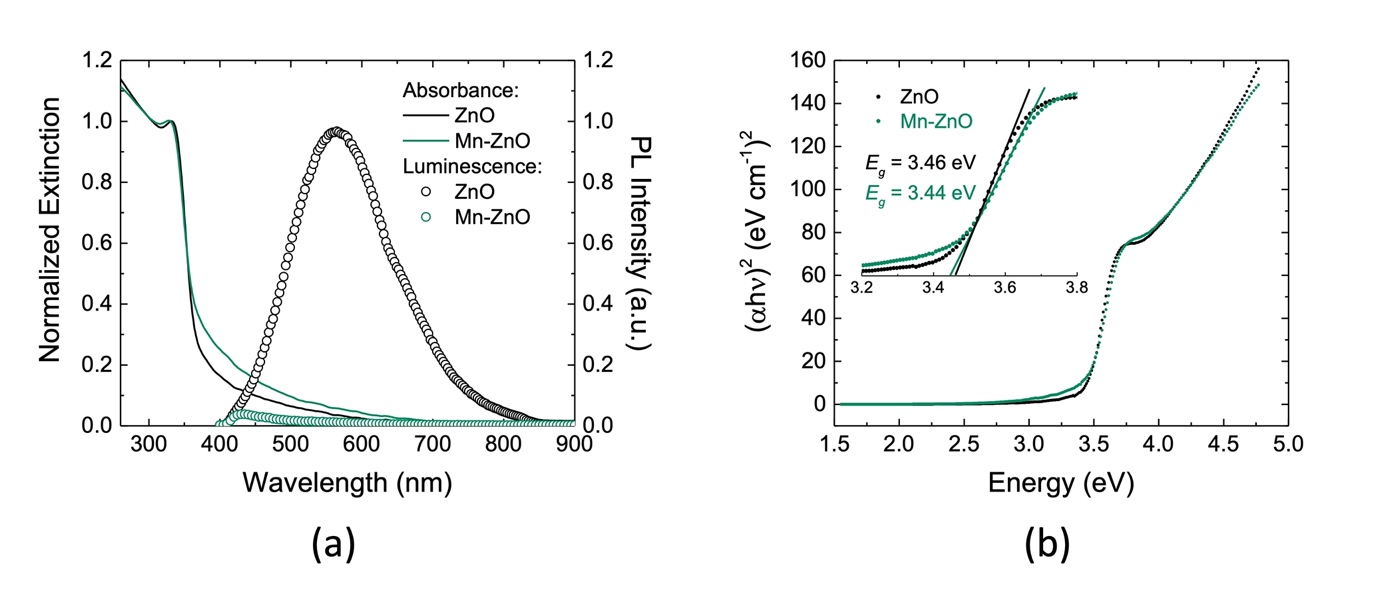


**Figure S3.** *(a) Normalized extinction (solid lines) and photoluminescence (spheres) spectra of ZnO NPs (black) and Mn-ZnO NPs (green). (b) Band gap energy calculation by Tauc graph; a close-up of the edge absorption region is shown in the inset.*

The room temperature UV-vis absorption spectra of ZnO NPs and Mn-ZnO NPs are shown in Figure S3(a). All spectra were recorded in 1cm quartz cuvettes in fluid DMSO suspension by using a Jasco V-570 spectrophotometer.

Both spectra show an intense absorption at high energies (up to 400 nm) and a moderate absorption extending throughout all the visible regions. The black line shows the ZnO NPs normalized extinction in DMSO fluid suspension at RT 1,2. The increasing of absorbance at higher energy can be attributed to the band-gap absorption of ZnO due to the electron transitions from the valence band to the conduction band 3,4 with an absorption maximum edge centered at 332 nm. ZnO NPs show intense photoluminescence (black dots spectrum) between 400 nm and 800 nm with a maximum of light emission at ~ 565 nm due to the electron-hole recombination following photoexcitation (exc = 330 nm) 5.

The green line shows the Mn-ZnO NPs absorption extinction in DMSO fluid suspension at RT. This spectrum shows a line shape very similar to the ZnO NPs spectrum with a maximum edge centered at 328 nm and more efficient light absorption from 350 nm to low energies, justifying the brown color of the suspension with respect the white undoped ZnO NPs. The blue shift in the edge of the absorption maximum ( = – 4 nm) suggest the correct Mn incorporation in the ZnO NPs, where Mn2+ ions replace Zn2+ within lattice (Burstein-Moss effect) 6,7. These data are corroborated by several works present in the literature 8,9, moreover a perfect correspondence has been found with the previous results demonstrating an excellent reliability and repeatability of the nanoparticles synthesis process 10. Mn dopant is also known to be a photoluminescence quenching agent. As already demonstrated 11, the used Mn2+ amount (nominal 2.5% with respect 97.5% of Zn2+) is enough to completely break down the characteristic ZnO emission 10, as showed by the green dotted PL spectrum in figure S2a. Fluorescence spectra were recorded in 1cm quartz cuvettes in fluid DMSO suspension by using a Horiba-Jobin Yvon FluoroMax-P fluorimeter equipped with a Hamamatsu R3896 photomultiplier. The fluorescence signal was acquired at 90 ° with respect to the incident excitation light (330 nm) with 5 nm slits. A high-pass filter with a cut-off of 400 nm was used to extend the acquisition up to 900 nm.

The direct band gap values for both nanoparticles are shown in figure S2b. The calculation of the direct band gap (*Eg*) of the NPs was carried out through the Tauc diagram 12. It reports the dependence of the absorption coefficient ** on the photon energy *hν* for near-edge optical absorption in semiconductors according to equation (1):


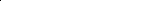


where *k* is a proportionality constant and** denotes the nature of the electronic transition and it is. For direct an allowed transition ** = 2.

The spectra obtained by plotting (h)2 vs h for ZnO NPs (black dots) and Mn-ZnO NPs (green dots) exhibit similar profiles as shown in figure S3b. The insert inside the graph shows an enlargement of the region between 3.2 eV and 3.8 eV to better appreciate the energy (eV) differences. As can be observed from the tangent line to the curve inflection pointat (h)2 = 0, the undoped ZnO NPs show a direct band gap energy value of 3.46 eV. As expected from quantum confinement, this value is slightly higher than the bulk ZnO band gap 13,14.

The direct band gap of the Mn-ZnO NPs extrapolated from the Tauc graph is 3.44 eV. This value is in agreement with previous studies 15 which demonstrate a slight reduction of the doped nanoparticles compared to the undoped ones.


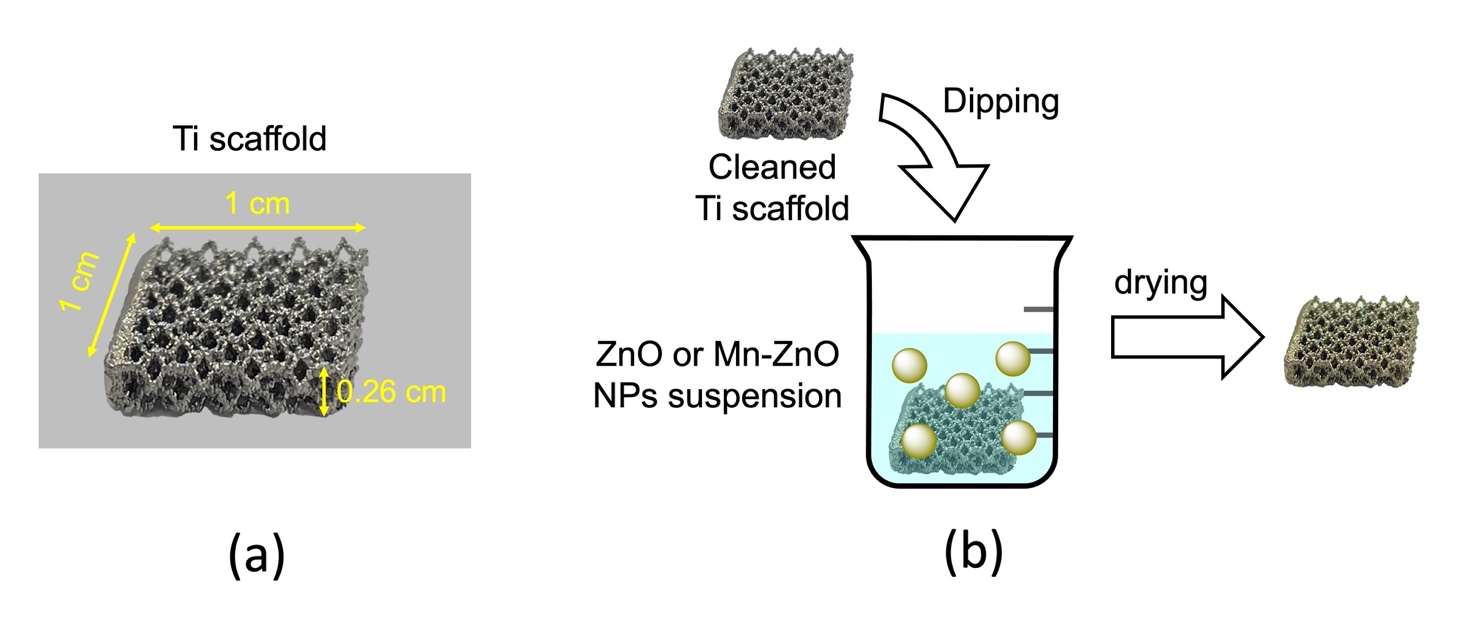


**Figure S4.** *(a) Photograph of the used Ti scaffolds. (b) Functionalization procedure of Ti scaffolds by dipping in ZnO and Mn-ZnO NPs suspensions.*


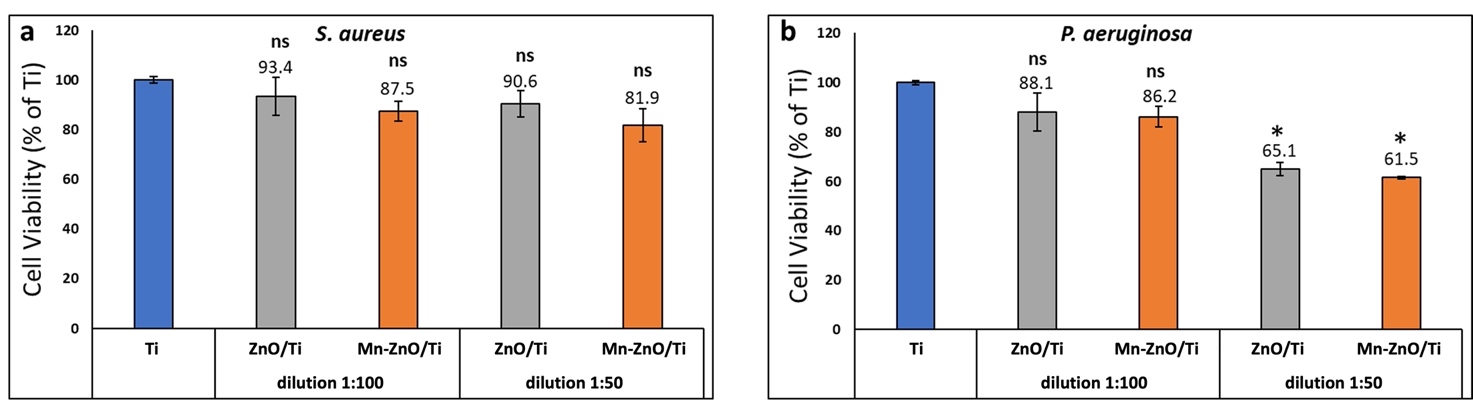


**Figure S5*.*** *Antimicrobial activity of titanium scaffolds coated with ZnO (ZnO/Ti) and Mn-ZnO ( Mn-ZnO/Ti) NPs diluted 1:100 and 1:50 on* *planktonic cells of S. aureus and P. aeruginosa. Data are shown as mean ± standard deviation. For ANOVA using Tukey's multiple comparison test, one (*), two (**) and three (***) asterisks identify p-values <0.05, <0.01, and <0.001, respectively.*


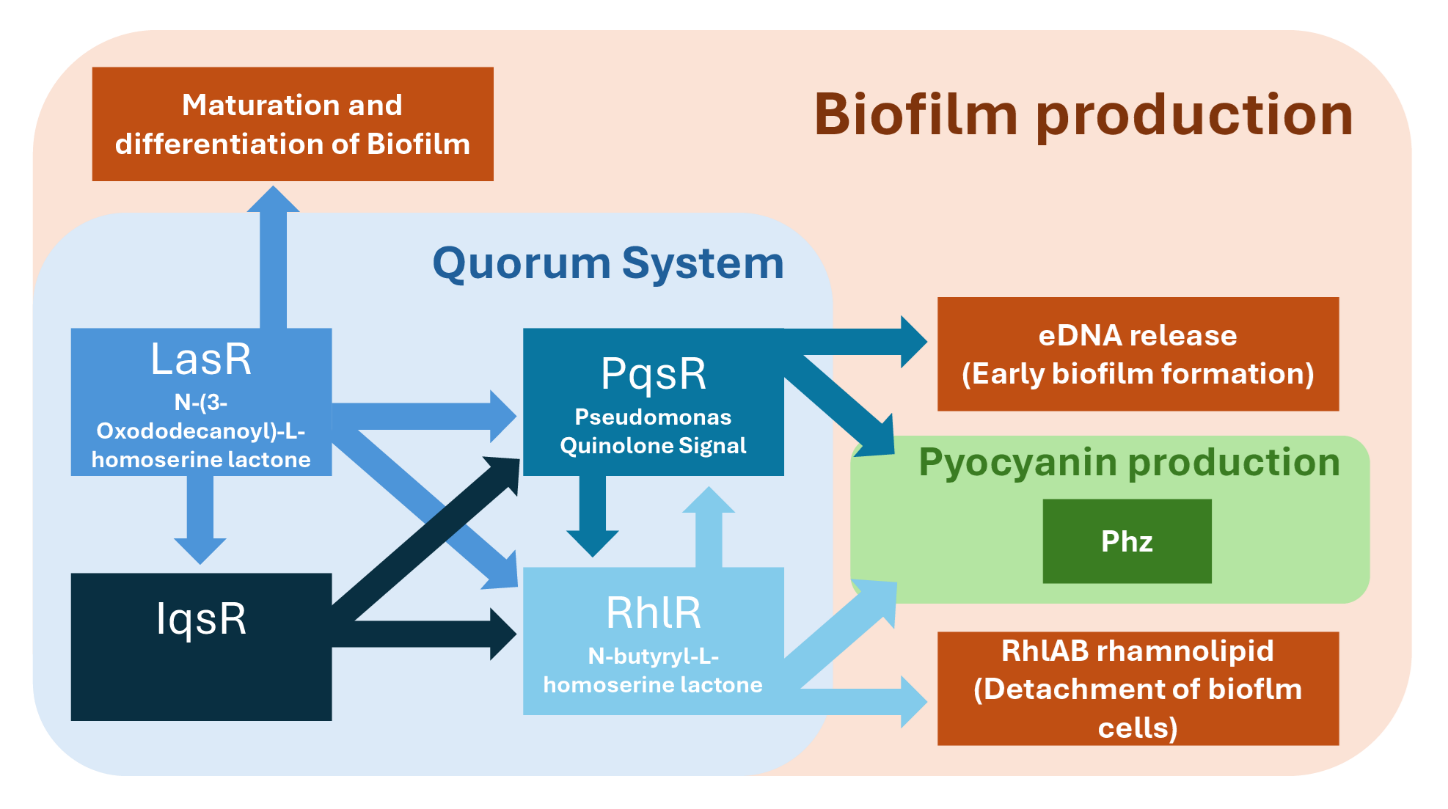


**Figure S6:** *Schematic diagram of Quorum Sensing signalling networks in P. aeruginosa and their role in biofilm and pyocyanin production.*

*
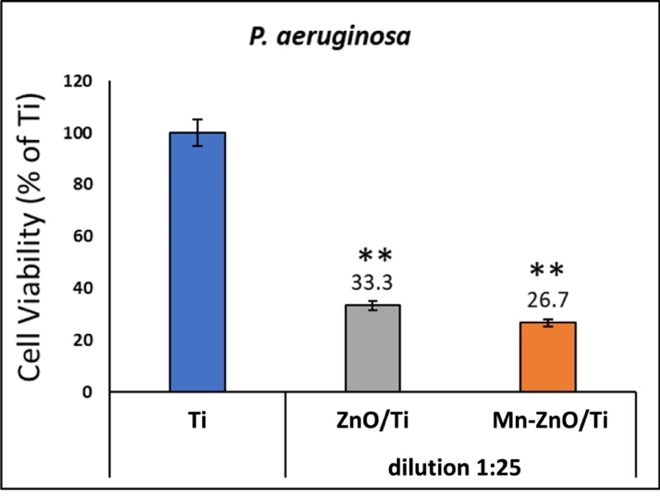
*

**Figure S7.** *Antimicrobial activity of titanium scaffolds coated with ZnO (ZnO/Ti) and Mn-ZnO (Mn-ZnO/Ti) Nps diluted 1:25 on sessile cells of P. aeruginosa. Data are shown as mean ± standard deviation. For ANOVA using Tukey's multiple comparison test, one (*), two (**) and three (***) asterisks identify p-values <0.05, <0.01, and <0.001, respectively.*

**Bibliography**

1. Kumar, S. S., Venkateswarlu, P., Rao, V. R. & Rao, G. N. Synthesis, characterization and optical properties of zinc oxide nanoparticles. *Int Nano Lett* **3**, 30 (2013).

2. Pachaiappan, R. *et al.* Green Synthesis of Zinc Oxide Nanoparticles by Justicia adhatoda Leaves and Their Antimicrobial Activity. *Chemical Engineering & Technology* **44**, 551–558 (2021).

3. Yu, H., Yu, J., Cheng, B. & Zhou, M. Effects of hydrothermal post-treatment on microstructures and morphology of titanate nanoribbons. *Journal of Solid State Chemistry* **179**, 349–354 (2006).

4. Zak, A. K., Abrishami, M. E., Majid, W. H. Abd., Yousefi, R. & Hosseini, S. M. Effects of annealing temperature on some structural and optical properties of ZnO nanoparticles prepared by a modified sol–gel combustion method. *Ceramics International* **37**, 393–398 (2011).

5. van Dijken, A., Meulenkamp, E. A., Vanmaekelbergh, D. & Meijerink, A. The Kinetics of the Radiative and Nonradiative Processes in Nanocrystalline ZnO Particles upon Photoexcitation. *J. Phys. Chem. B* **104**, 1715–1723 (2000).

6. Saw, K. G., Aznan, N. M., Yam, F. K., Ng, S. S. & Pung, S. Y. New Insights on the Burstein-Moss Shift and Band Gap Narrowing in Indium-Doped Zinc Oxide Thin Films. *PLOS ONE* **10**, e0141180 (2015).

7. Yogamalar, N. R. & Chandra Bose, A. Burstein–Moss shift and room temperature near-band-edge luminescence in lithium-doped zinc oxide. *Appl. Phys. A* **103**, 33–42 (2011).

8. Sabri, N. S., Yahya, A. K. & Talari, M. K. Emission properties of Mn doped ZnO nanoparticles prepared by mechanochemical processing. *Journal of Luminescence* **132**, 1735–1739 (2012).

9. Karamat, S. *et al.* Structural, optical and magnetic properties of (ZnO)1−x(MnO2)x thin films deposited at room temperature. *Applied Surface Science* **254**, 7285–7289 (2008).

10. Calabrese, G. *et al.* Structural and antibacterial studies of novel ZnO and ZnxMn(1−x)O nanostructured titanium scaffolds for biomedical applications. *Biomaterials Advances* **145**, 213193 (2023).

11. Ali, A. G., Dejene, F. B. & Swart, H. C. Effect of Mn doping on the structural and optical properties of sol-gel derived ZnO nanoparticles. *centr.eur.j.phys.* **10**, 478–484 (2012).

12. Tauc, J. Optical properties and electronic structure of amorphous Ge and Si. *Materials Research Bulletin* **3**, 37–46 (1968).

13. Youn, C. J., Jeong, T. S., Han, M. S. & Kim, J. H. Optical properties of Zn-terminated ZnO bulk. *Journal of Crystal Growth* **261**, 526–532 (2004).

14. Özgür, Ü. *et al.* A comprehensive review of ZnO materials and devices. *Journal of Applied Physics* **98**, 041301 (2005).

15. Khan, S. B., Khan, M. I. & Nisar, J. Microwave-Assisted Green Synthesis of Pure and Mn-Doped ZnO Nanocomposites: In Vitro Antibacterial Assay and Photodegradation of Methylene Blue. *Frontiers in Materials* **8**, (2022).
